# 1 Combining molecular gut content analysis and functional response models shows 2 how body size affects prey choice in soil predators

3 Bernhard Eitzinger<sup>1,2\*</sup>, Björn C. Rall<sup>3,4</sup>, Michael Traugott<sup>5</sup>, Stefan Scheu<sup>1</sup>

4

5 <sup>1</sup> J.F. Blumenbach Institute of Zoology and Anthropology, Georg August University Göttingen, Berliner Straße 28,  
6 37073 Göttingen, Germany

7 <sup>2</sup> Department of Agricultural Sciences, University of Helsinki, Latokartanonkaari 5, Helsinki, Finland

8 <sup>3</sup> German Centre for Integrative Biodiversity Research (iDiv) Halle-Jena-Leipzig, Deutscher Platz 5e, 04103 Leipzig,  
9 Germany

10 <sup>4</sup> Institute of Ecology, Friedrich Schiller University Jena, Dornburger- Straße 159, 07743 Jena, Germany

11 <sup>5</sup> Mountain Agriculture Research Unit, Institute of Ecology, University of Innsbruck, Technikerstraße 25, 6020  
12 Innsbruck, Austria

13

14 \*Corresponding author: [bernhard.eitzinger@helsinki.fi](mailto:bernhard.eitzinger@helsinki.fi)

15

16

## 17 **Summary**

18 1. Predator-prey interactions are a core concept of animal ecology and functional response  
19 models provide a powerful tool to predict the strength of trophic links and assess motives for  
20 prey choice. However, due to their reductionist set-up, these models may not display field  
21 conditions, possibly leading to skewed results.

22 2. We tested the validity of functional response models for multiple prey by comparing them  
23 with empirical data from DNA-based molecular gut content analysis of two abundant and  
24 widespread macrofauna soil predators, lithobiid and geophilomorph centipedes.

25 3. We collected soil and litter dwelling centipedes, screened their gut contents for DNA of nine  
26 abundant decomposer and intraguild prey using specific primers and tested for different prey  
27 and predator traits explaining prey choice. In order to calculate the functional response of  
28 same predators, we used natural prey abundances and functional response parameters from  
29 published experiments and compared both approaches.

30 4. Molecular gut content results showed that prey choice of centipedes is driven by predator  
31 body size and prey identity. Results of functional response models significantly correlated  
32 with results from molecular gut content analysis for the majority of prey species.

33 5. Overall, the results suggest that functional response models are a powerful tool to predict  
34 trophic interactions in soil, however, species-specific traits have to be taken into account to  
35 improve predictions.

36

## 37 **Keywords**

38 allometric scaling, food webs, generalist predator, molecular prey detection, predator-prey  
39 interaction

40

#### 41 ***Introduction***

42 Analysis of consumer-resource interactions is key to understand the structure and dynamics of food  
43 webs, eventually explaining composition, stability and development of communities and ecological  
44 processes coupled with them. Depending on the specific problem and scale of feeding interactions,  
45 21<sup>st</sup> century ecologists are in the comfortable position to select from a broad spectrum of methods,  
46 from field observations to molecular tracking of nutrients and DNA in the consumer's body.  
47 Measuring the functional response, i.e. the intake rate of a consumer (hereafter referred to as  
48 *predator*) as a function of food resource (hereafter referred to as *prey*) density has been  
49 demonstrated to be a powerful method not only to track feeding interactions but also to assess the  
50 interaction strength (Holling 1959). Based on a small set of parameters including densities and body  
51 sizes of prey and predator, functional response models allow predicting general patterns and  
52 mechanisms of trophic interactions in very different systems, spanning from *Daphnia* water fleas  
53 feeding on phytoplankton to wolf packs preying on moose (Sarnelle & Wilson 2008, Messier 1994).  
54 The approach allows investigating feeding interactions on a large scale, and can be modified to  
55 include changes in body size (Hansen *et al.* 1997, Pawar *et al.* 2012, Rall *et al.* 2012), ambient  
56 temperature (Hansen *et al.* 1997, Englund *et al.* 2011, Rall *et al.* 2012) as well as habitat structure  
57 (Hauzy *et al.* 2010, Kalinkat *et al.* 2013a, Kalinkat & Rall 2015).

58 The simplicity of functional responses, however, may come at the cost of accuracy. Functional  
59 response curves, in particular those of invertebrate species, are typically based on single-prey-  
60 predator laboratory feeding trials, which lack many characteristics of natural settings. Among these  
61 potentially important characteristics are habitat structure, presence of competitors and alternative  
62 prey as well as different physiological states of prey and predator (e.g. sick prey). Thus, functional  
63 response models based on idealized laboratory settings may be of limited use to predict feeding

64 interactions in the field. Here, other methods apply, which allow us to analyse the character and  
65 intensity of predator-prey interactions under natural settings directly in the field.

66 DNA-based molecular gut content analysis offers a state-of-the-art technique (Pompanon *et al.* 2012;  
67 Traugott *et al.* 2013) to identify trophic links under challenging conditions, from sea shores (Peters  
68 *et al.* 2014), over arctic tundra (Wirta *et al.* 2015) to arable soils (Wallinger *et al.* 2014). Using  
69 specifically designed PCR assays targeting prey DNA in a predator's gut, species-specific trophic  
70 interactions can be tracked even several days after the feeding event, allowing unravelling of  
71 trophic links in unprecedented detail (Eitzinger *et al.* 2013). Hence, molecular gut content analysis  
72 allows to empirically assess complex trophic interactions in the field and provides the opportunity  
73 to evaluate functional response models under natural conditions.

74 We adopted this approach for the first time using for a soil predator-prey system in European  
75 deciduous forests. Here, we analysed the predation frequency on extra- and intraguild prey of  
76 centipedes (Chilopoda, Myriapoda), widespread generalist predators in the litter and soil layers of  
77 temperate forests (Lewis 1981; Poser 1988) using predictive models from functional response  
78 experiments and compare these with empirically quantified trophic links using molecular gut  
79 content analysis. By the combined use of both approaches we aimed at achieving an integrated view  
80 of food web interactions in complex systems and evaluate the suitability and effectiveness of the  
81 approaches for analysing trophic interactions.

82 Centipedes, in particular lithobiid (Lithobiidae) and geophilomorph (Geophilomorpha) species prey  
83 on a variety of prey taxa including Collembola, Diptera larvae and Lumbricidae (Günther *et al.*  
84 2014). Lithobiids predominantly colonize the litter layer and perform a sit-and-wait strategy of prey  
85 capture, whereas geophilomorph centipedes are active hunters in crevices of the mineral soil (Lewis  
86 1981; Poser 1988; Eitzinger *et al.* 2013). Prey capture of centipedes specifically depends on body  
87 size indicating an allometric relationship between predator and prey size (Schneider *et al.* 2012,  
88 Günther *et al.* 2014). Typically, small predators have narrow diets while large predators feed on a  
89 wider range of prey including higher trophic level taxa, i.e. intraguild prey (Woodward & Hildrew

90 2002; Riede *et al.* 2011). Body-size dependent prey-switching, coupled with feeding on intraguild  
91 prey may be a key factor reducing dietary niche overlap (Woodward & Hildrew 2002). Moreover,  
92 this might explain coexistence of different centipede species and other predators in forest soils.  
93 Studies employing functional response models suggested that the body size acts as a supertrait,  
94 explaining most of the variance in predator-prey interactions in soil systems (Vucic-Pestic *et al.*  
95 2010, Kalinkat *et al.* 2013b). Hence, allometry-based functional response models may be applied to  
96 many different predator-prey-interactions.

97 Based on the generalised allometric functional response model by Kalinkat *et al.* (2013b), we  
98 calculated body-size dependent trophic interaction strength of centipede predators as a function of  
99 natural abundances of different prey groups present in soil of unmanaged beech forests in central  
100 Germany. We then analysed the gut content of field-collected centipedes from the same forests  
101 using nine group- and five species-specific primers for DNA of extra- and intraguild prey taxa. We  
102 hypothesized that (i) feeding interactions of centipedes are driven by predator-prey body-size ratios  
103 rather than by taxonomy, and that (ii) functional response models can correctly predict actual  
104 feeding interactions in a complex system such as soil.

105

## 106 ***Materials and Methods***

### 107 *Sampling*

108 Invertebrate predators were collected in four unmanaged beech forests (> 120 years old) within the  
109 national park Hainich near Mülverstedt (Thuringia, Germany). Each study plot spanned 100 × 100  
110 m and formed part of the Biodiversity Exploratories, an integrated biodiversity project (Fischer *et al.*  
111 2010). To investigate trophic links during periods of maximum invertebrate activity, we sampled  
112 animals in autumn and spring/early summer, each represented by four sampling dates (October 8,  
113 20 and 28 and November 3, 2009; June 15, 24 and 29 and July 8, 2010). Centipedes were collected  
114 by sieving litter, transferred individually to 1.5 mL microcentrifuge tubes and placed immediately at  
115 -20 °C.

116 To record the species spectrum and abundance of prey organisms, two large (20 cm diameter, 10 cm  
117 deep) and two small (5 cm diameter, 10 cm deep) soil cores per plot were taken in May of 2008 and  
118 2011 (Klarner *et al.* 2014). Animals were extracted using a high gradient extractor (Kempson *et al.*  
119 1963), stored in 75% ethanol and identified to the species level (except dipteran larvae).  
120 Additionally, lumbricids were collected by hand after application of mustard solution (Eisenhauer *et*  
121 *al.* 2008). Average densities between the two sampling dates were taken to represent prey density at  
122 the sampling dates of centipedes. We assume this to be justified as soil arthropod composition and  
123 density changes little between years (Bengtsson 1994).

124 A total of 532 field-caught *Lithobius* spp. and 65 geophilomorph centipedes were identified to  
125 species level using the keys of Eason (1964) and Latzel (1880). Further, we determined  
126 developmental stages and body length of each individual. Body mass of lithobiid centipedes was  
127 calculated using the following equation:

128

$$\log_{10}M = 2.32784 * \log_{10}L - 1.24015 \quad (1)$$

129

130 where  $M$  is the fresh body mass and  $L$  the body length of individuals. The equation is based on body  
131 length - body mass relationship of 560 lithobiid individuals used in laboratory studies (Eitzinger *et*  
132 *al.* 2014). Based on body size of collected specimens from the study site the body mass of  
133 geophilomorph centipedes and all prey taxa was calculated using formulas given in Gowing and  
134 Recher (1984) and Mercer (2001). Body mass (for predator and prey) and prey abundance were  
135  $\log_{10}$ -transformed prior to statistical analyses.

136

### 137 *DNA extraction*

138 Centipedes were subjected to CTAB-based DNA-extraction protocol (Juen & Traugott 2005) with  
139 modifications given in Eitzinger *et al.* (2013). DNA extracts were purified using GeneClean Kit (MP  
140 Biomedicals, Solon, OH, USA). To test for DNA carry-over contamination a blank control was

141 included within a batch of 47 individuals. None was found when testing all extracts for false  
142 negatives and false positives, using the universal invertebrate primer pair LCO1490/HCO2198  
143 (Folmer *et al.* 1994) amplifying a *c.* 700 bp fragment of the cytochrome *c* oxidase subunit I gene  
144 (*COI*). Each 10  $\mu$ L PCR contained 5  $\mu$ L PCR SuperHot Mastermix (2 $\times$ ), 1.25 mM MgCl<sub>2</sub> (both  
145 Geneaxxon, Ulm, Germany), 0.5  $\mu$ L bovine serum albumin (BSA, 3%; Roth, Karlsruhe, Germany),  
146 0.5  $\mu$ M of each primer and 3  $\mu$ L of DNA extract. PCR cycling conditions were 95 °C for 10 min  
147 followed by 35 cycles at 95 °C for 30 s, 48 °C for 30 s, 72 °C for 90 s and a final elongation at 72  
148 °C for 10 min. PCR products were separated in 1% ethidium bromide-stained agarose gels and  
149 visualized under UV-light.

150

#### 151 *Screening predators for prey DNA*

152 DNA extracts were screened for five extraguild and three intraguild prey (i.e. other predators) taxa  
153 using group-specific primers. PCR mixes and thermocycling conditions were the same as above  
154 only differing in applied primers, an elongation step at 72 °C for 45 s and the primer pair-specific  
155 annealing temperature. Geophilomorph centipedes additionally were tested for consumption of  
156 *Lithobius* spp. intraguild prey. All predator samples scoring positive for Collembola were  
157 subsequently tested for abundant Collembola species *Ceratophysella denticulata*,  
158 *Folsomia quadrioculata*, *Lepidocyrtus lanuginosus*, *Protaphorura armata* and *Pogonognathellus*  
159 *longicornis* (for primers and annealing temperature see Table S1, Supporting Information).

160 Specificity of the PCR assays was warranted by testing against a set of up to 119 non-target  
161 organisms (Eitzinger *et al.* 2013). PCR products were separated using the capillary electrophoresis  
162 system QIAxcel (Qiagen, Hilden, Germany); fragments of the expected size and a relative  
163 fluorescent value  $\geq 0.1$  RFU were scored as positive. PCR products showing no result were re-  
164 tested once.

165

#### 166 *Statistical analysis*

167 To compare prey DNA detection rates between predator taxa at the  $P < 0.05$  level, 95% tilting  
168 confidence intervals (CI; Hesterberg *et al.* 2003) were calculated by 9999 bootstrap resamples using  
169 s-plus 8.0 (Insightful Corporations, Seattle, WA, USA).

170 Relationships between prey detection rates and predator identity, predator body mass, square of  
171 predator body mass, predator development stage (immature or adult), prey identity, prey body mass  
172 and prey abundance were analysed by generalized linear models (GLM) in R 2.12.2 (R  
173 Development Core Team 2011) using the function `glm {stats}`. Based on Akaike information  
174 criterion (AIC) we selected the most parsimonious model (Burnham and Anderson 2004). Prey  
175 DNA detection data was coded as binary (prey DNA present or absent).

176 A multi-prey functional response model was used to calculate feeding rates  $F$  of centipede predator  
177  $i$  and prey  $j$  when alternative prey organisms  $k$  are present (note that  $k$  includes  $j$ ; Kalinkat *et al.*  
178 2011):

179

$$F_{ij} = \frac{b_{ij} N_j^{1+q_{ij}}}{1 + \sum_{k=1}^{k=n} b_{ik} h_{ik} N_k^{1+q_{ik}}} \quad (2)$$

180

181 with  $N$  the prey density (individuals/m<sup>2</sup>),  $n$  the number of alternative prey items,  $h$  [s] the handling  
182 time (time for killing, ingesting and digesting prey),  $b$  the capture coefficient and  $q$  the scaling  
183 exponent that converts hyperbolic type-II ( $q = 0$ ) into sigmoid type-III ( $q > 0$ ) functional responses  
184 (Kalinkat *et al.* 2013b). We used prey-specific body masses [g] and values for generalised  
185 allometric functional response (Kalinkat *et al.* 2013b) to calculate  $b$ ,  $h$  and  $q$  for each of the eight  
186 most important prey groups and added plot-specific prey density data (see above). The relative  
187 proportion of each of the eight prey-specific feeding rates per plot and for all plots combined was  
188 measured, resulting in prey-specific feeding ratios,  $F_{rel}$ :

$$F_{rel_{ij}} = \frac{F_{ij}}{\sum_{k=1}^{k=n} F_{ik}} \quad (3)$$

189

190 Additionally, we related both prey detection and feeding ratios to body size of predators.

191 For each prey group, we then compared the relative proportion of prey in the predator's diet with

192 the proportion of prey-DNA-positive predators using Pearson's correlation coefficient in R 2.12.2.

193

## 194 **Results**

### 195 *Centipede community*

196 Among the 597 centipedes collected during the sampling periods, nine species of lithobiid

197 (*Lithobius aulacopus*, *L. crassipes*, *L. curtipes*, *L. dentatus*, *L. melanops*, *L. muticus*, *L. mutabilis*,

198 *L. nodulipes* and *L. piceus*) and three species of geophilomorph centipedes (*Geophilus* sp.,

199 *Schendyla nemorensis*, *Strigamia acuminata*) of both sexes and different developmental stages were

200 identified. Body sizes / body masses ranged between 2-18 mm / 0.28 - 48.07 mg in lithobiids and 8-

201 47 mm / 1.58 - 16.70 mg in geophilomorph centipedes.

202

### 203 *Prey DNA screening*

204 A total of 532 *Lithobius* spp. and 65 geophilomorph centipedes collected at the eight sampling dates

205 were tested for DNA of five and four extra- and intraguild prey taxa, respectively. Per sampling

206 date 41-91 *Lithobius* spp. and 4-12 geophilomorph centipedes were investigated.

207 DNA of each of the prey organisms tested could be detected in at least one predator individual.

208 Lithobiid predators were significantly more often tested positive for Collembola than for any other

209 prey group (Fig. 1A). Detection rates of Diptera and Lumbricidae were significantly higher than

210 those of other extraguild prey, such as Isopoda and Oribatida. Intraguild prey formed only a minor

211 fraction of lithobiid prey: detection frequencies of Mesostigmata were followed by Staphylinidae

212 and Araneida. In 69 predators two or three prey taxa were detected in one individual. The lithobiids

213 which tested positive with the general Collembola primers ( $n=141$ ) consumed significantly more



214 *Folsomia quadrioculata* than any other of the four tested Collembola species (Fig. 1B).

215 In geophilomorph centipedes extraguild prey, such as Collembola and Diptera, were most often  
216 detected followed by Lumbricidae, Isopoda and Oribatida (Fig. 1C). Detection rates for intraguild  
217 prey were highest for Staphylinidae, followed by Araneida and Mesostigmata. None of the five  
218 Collembola species could be detected in geophilomorph centipedes tested positive for Collembola.  
219 In 14 geophilomorph centipedes two or three prey taxa were detected simultaneously.

220

### 221 *Factors influencing prey consumption*

222 We selected the most parsimonious model based on AIC comparison, thereby rejecting models  
223 containing factors centipede identity and development stage. Overall, lithobiid feeding was  
224 significantly affected by prey identity and predator body mass (Table 1), with preferences of  
225 predators for certain prey sizes. For Collembola and Lumbricidae prey, the probability of prey  
226 detection in relation to predator body mass followed a unimodal curve, peaking at body masses of  
227 6.3 mg and 4.9 mg, respectively (Fig. 2). In contrast, detection probability of Diptera prey increased  
228 exponentially with predator body mass, indicating that Diptera are increasingly fed on by larger  
229 lithobiids while being rejected by smaller ones. Prey detection probabilities for Oribatida,  
230 Mesostigmata, Staphylinidae and Isopoda, despite being generally low, also increased with predator  
231 body mass, with the curve flattening at 25, 60, 62 and 69 mg predator body mass, respectively.  
232 Feeding on another intraguild prey, Araneida, however, showed a steady decrease with body mass.

233 Feeding of geophilomorph centipedes varied with prey identity, predator body mass (including  
234 square of predator body mass) and prey abundance (Table S2, Supporting Information). In contrast  
235 to lithobiids, detection rates followed a unimodal curve for each of the prey taxa (Fig. S3,  
236 Supporting Information).

237

### 238 *Prey proportions according to functional response models*

239 According to the functional response models, Collembola, Oribatida and Mesostigmata accounted

240 for most of the diet of lithobiid and geophilomorph centipedes, showing a bimodal relationship with  
241 predator body mass (Fig. 3; Fig. S4, Supplementary Information). Diptera and Isopoda prey  
242 portions increased slightly at highest body masses, while other prey did not form part of the diet of  
243 the centipede predators.

244

#### 245 *Comparison of functional response models with molecular gut content analysis*

246 The relative proportion of a specific prey in the centipedes' diet, as calculated by functional  
247 response models and the proportion of prey-DNA-positive centipedes, as calculated from the  
248 molecular gut content analysis significantly correlated for each of the prey group (Pearson  
249 correlation coefficient,  $P < 0.001$ ; Fig. 4). While we found a positive correlation for the five prey  
250 groups Collembola, Diptera, Isopoda, Oribatida and Staphylinidae the other three prey groups had a  
251 negative relationship. In geophilomorph centipedes, only correlations with Lumbricidae,  
252 Staphylinidae and Collembola were significantly positive ( $P < 0.05$ ), while Mesostigmata showed a  
253 significant negative correlation ( $P < 0.001$ ). The other prey groups did not show any significant  
254 correlation.

255

#### 256 **Discussion**

257 The present study provides the first strong evidence that generalised allometric functional response  
258 models are an appropriate method to assess predator-prey interactions in complex systems, which  
259 include high levels of habitat structure, competitors and alternative prey. We tested if these models  
260 correctly predict relative feeding strength of generalist predators in a species- rich soil system by  
261 comparing with empirically quantified prey proportions in the diet of predators as indicated by  
262 molecular gut content analysis. Model and empirical data positively correlated in five of eight tested  
263 prey species, suggesting high explanatory power of the functional response models. Corroborating  
264 previous studies employing functional response models (Vucic-Pestic *et al.* 2010, Rall *et al.* 2011),  
265 we also empirically showed that 'predator body size' and 'prey identity' are two major drivers of

266 prey capture in soil-dwelling predators.

267 The functional response models predicted high feeding rates of both lithobiid and geophilomorph  
268 centipedes on mesofaunal prey including Collembola, oribatid and mesostigmatid mites. A  
269 combination of high prey abundance, facilitating high encounter rates, and an optimal predator-prey  
270 body mass relationship allows the predator to forage on a maximum of prey individuals with a  
271 minimum of handling time, thereby reducing energetic costs (Aljetlawi *et al.* 2004, Brose *et al.*  
272 2008, Vucic-Pestic *et al.* 2010). Results of the model used in this study allowing to track shifts from  
273 a hyperbolic (type-II) to a sigmoid (type-III) functional response suggest that with increasing  
274 predator body mass relative feeding rates follow a roller-coaster-pattern, peaking at the respective  
275 optimal body-mass ratios.

276 Feeding rates on other than mesofauna prey, however, were consistently low, only increasing  
277 slightly in large lithobiids and geophilomorph centipedes. As metabolism increases with body size,  
278 consumers require a higher energy uptake which is covered by the ingestion of more prey biomass,  
279 i.e. more small prey or larger prey individuals (Kalinkat *et al.* 2011). This is in line with earlier  
280 studies (Woodward & Hildrew 2002, Kalinkat *et al.* 2011) showing that with the increase in  
281 predator body mass prey preference shifts towards bigger prey while at the same time still being  
282 able to exploit small prey.

283 Results from the molecular gut content analysis corroborate the body-size dependent change in prey  
284 capture in the mathematical model. Centipedes exhibit unimodal feeding responses for 75% of the  
285 studied prey taxa, with large predator individuals more frequently feeding on more prey taxa than  
286 small predators. Analogous to the model, mesofauna taxa constitute the most important prey except  
287 for oribatid mites, which were detected in only 0.94% and 4.62% of the tested lithobiid and  
288 geophilomorph centipedes, respectively. While their high abundances and optimal body size  
289 suggest them to be ideal prey in the model, other traits, particularly their hard exoskeleton and toxic  
290 secretions seem to be effective defence traits, explaining why they were only rarely consumed

291 (Peschel *et al.* 2006, Heethoff *et al.* 2011).

292 Collembola-DNA was detected in most centipedes, particularly medium-sized individuals.

293 Collembola are abundant in virtually any terrestrial ecosystem and of high nutritional value thereby

294 functioning as major prey for a wide range of predators in soil throughout the globe (Marcussen *et*

295 *al.* 1999, Bilde *et al.* 2000, Oelbermann *et al.* 2008). Using a taxonomic-allometric model, Rall *et al.*

296 (2011) calculated an optimal body mass ratio of 649 between the lithobiid centipede species

297 *L. forficatus* and the Collembola species *Heteromurus nitidus*. In our study a similar ratio applied to

298 *L. lanuginosus* and *P. armata*, the second and third most often detected Collembola prey species of

299 lithobiid centipedes, respectively.

300 Lumbricidae, on the other hand, were a far more important prey than expected from the functional

301 response model. Lumbricidae for long have been regarded as major prey of centipedes, in particular

302 geophilomorph species (Lewis 1981), however, their low abundances and big size (as compared to

303 mesofauna taxa) make them an unlikely prey in our allometric model. Using their poison claws,

304 however, centipedes kill prey far below the optimal body-mass ratio (Eason 1964), and this resulted

305 in underestimation of the importance of earthworms as prey of centipedes.

306 Interestingly, we found a strong increase in feeding on Diptera larvae with lithobiid body size, even

307 stronger than predicted by the model. In combination with reduced feeding on other important prey,

308 Collembola and Lumbricidae, this suggests prey switching towards this abundant prey of high

309 nutritional value (Oelbermann & Scheu 2002). Prey switching has been reported in many studies

310 (Hohberg & Traunspurger 2005, Petchey *et al.* 2008) and its frequency is increasing if predators

311 become larger, presumably due to a combination of effects of habitat structure and optimal foraging

312 processes (Murdoch & Oaten 1975, Kalinkat *et al.* 2013a) as described as follows:

313 Habitat structure modifies lithobiid feeding by allowing small prey such as Collembola but also

314 small Lumbricidae, to take refuge from predation, forcing particularly large predator individuals to

315 focus on more accessible prey dwelling in the upper litter layer (Günther *et al.* 2014).

316 Simultaneously, larger predators have higher energetic demands forcing them to hunt for larger prey,  
317 i.e. bigger individuals of species already feeding upon or a new, larger species. Higher energetic  
318 costs of killing, ingesting and digesting (i.e. 'handling time') prey, such as tipulid fly larvae or large  
319 earthworms are more easily balanced by the prey's high nutritional value. However, the results  
320 suggest that to meet their nutritional and energetic demands, large lithobiid centipedes cannot be too  
321 selective in their prey choice: their spectrum still includes mesofauna prey and also encompasses  
322 intraguild prey, such as spiders and staphylinid beetles. These results confirm earlier studies  
323 showing that the prey spectrum of predators broadens with predator body size, suggesting that large  
324 predators exploit prey communities more efficiently (Cohen *et al.* 1993; Woodward & Hildrew  
325 2002). On the other hand our findings argue against suggestions that at high density of extraguild  
326 prey intraguild predation is negligible (Halaj & Wise 2002, Eitzinger & Traugott 2011). Further, the  
327 results contradict findings that the role of intraguild predation is reduced in well-structured habitats  
328 providing refuge for intraguild prey (Finke & Denno 2002, Janssen *et al.* 2007).

329

### 330 *Conclusions*

331 The present study, for the first time, investigated the impact of predator body size and prey  
332 abundance on predator consumption using two different approaches, functional response models  
333 and molecular gut content analysis. Both methods proved to be useful to study trophic interactions,  
334 the first one to analyse feeding strengths based on body size ratios and abundances, the latter to  
335 examine predator-prey interactions of individual predators on small scale. While these methods  
336 measure different parameters, i.e. feeding rate and prey DNA detection frequency, respectively,  
337 results of the present study suggest that they complement each other allowing to prove and extend  
338 theoretical predictions under natural settings. Therefore, combining these two techniques may  
339 ultimately allow uncovering the structure of food webs in particular those in opaque habitats  
340 colonized by minute animal species.

341 Combining functional responses with molecular gut content analyses and including predator-prey  
342 body size ratios we are able to explain the majority of feeding interactions in belowground systems.  
343 This emphasizes that allometric constraints override taxonomic constraints in structuring soil food  
344 webs. Further, in contrast to food webs in simply structured habitats, such as aquatic systems, prey  
345 abundance did not affect prey ingestion rates in this soil system, pointing to the importance of prey  
346 identity effects as driving factors. Therefore, for improving the effectiveness of allometric  
347 functional response models in predicting food web interactions in the field, additional traits of prey  
348 species, such as defence characteristics, have to be included.

349

350

#### 351 *Author's contributions*

352 B.E. and B.C.R. conceived the ideas and designed methodology with contributions from M.T. and  
353 S.S.; B.E. collected the data, and B.E. and B.C.R. analysed the data; B.E. drafted the manuscript.  
354 All authors contributed to later drafts and gave final approval for publication.

355

#### 356 *Acknowledgments*

357 We thank the managers of the three Exploratories, Kirsten Reichel-Jung, Swen Renner, Katrin  
358 Hartwich, Sonja Gockel, Kerstin Wiesner, and Martin Gorke for their work in maintaining the plot  
359 and project infrastructure; Christiane Fischer and Simone Pfeiffer for giving support through the  
360 central office, Michael Owonibi for managing the central data base, and Markus Fischer, Eduard  
361 Linsenmair, Dominik Hessenmöller, Jens Nieschulze, Daniel Prati, Ingo Schöning, François Buscot,  
362 Ernst-Detlef Schulze, Wolfgang W. Weisser and the late Elisabeth Kalko for their role in setting up  
363 the Biodiversity Exploratories project. The work has been funded by the DFG Priority Program  
364 1374 "Infrastructure-Biodiversity-Exploratories". Field work permits were issued by the responsible  
365 state environmental offices of Thüringen (according to § 72 Bbg NatSchG).

366 We particularly want to thank Olga Ferlian, Stephan Töppich and David Ott for their help with  
367 fieldwork, Bernhard Klarner for providing data on prey abundance and Christoph Digel and Amrei  
368 Binzer for help with statistics.

369

370 ***Data accessibility***

371 If the manuscript gets accepted, the authors will make data available on the Dryad Digital  
372 Repository ([www.datadryad.org](http://www.datadryad.org)).

373

374 **References**

- 375 Aljetlawi, A.A., Sparrevik, E. & Leonardsson, K. (2004) Prey-predator size- dependent functional response:  
376 derivation and rescaling to the real world. *Journal of Animal Ecology*, **73**, 239–252
- 377 Bengtsson, J. (1994) Temporal predictability in forest soil communities. *Journal of Animal Ecology*, **63**, 653-  
378 665.
- 379 Bilde, T., Axelsen, J. A., & Toft, S. (2000) The value of Collembola from agricultural soils as food for a  
380 generalist predator. *Journal of Applied Ecology*, **37**, 672–683.
- 381 Brose, U., Ehnes, R. B., Rall, B. C., Vucic-Pestic, O., Berlow, E. L., & Scheu, S. (2008) Foraging theory  
382 predicts predator-prey energy fluxes. *Journal of Animal Ecology*, **77**, 1072–8.
- 383 Burnham, K.P. & Anderson, D.R. (2004) Multimodel inference – understanding AIC and BIC in model  
384 selection. *Sociological Methods and Research*, **33**, 261–304
- 385 Cohen, J.E., Pimm, S.L., Yodzis, P. & Saldaña, J. (1993) Body sizes of animal predators and animal prey in  
386 food webs. *Journal of Animal Ecology*, **62**, 67–78.
- 387 Eason, E.H. (1964) Centipedes of the British Isles. Warne, London, 294 pp.
- 388 Eisenhauer, N., Straube, D., & Scheu S. (2008) Efficiency of two widespread non- destructive extraction  
389 methods under dry soil conditions for different ecological earthworm groups. *European Journal of*  
390 *Soil Biology*, **44**, 141–145.
- 391 Eitzinger, B. & Traugott, M. (2011) Which prey sustains cold-adapted invertebrate generalist predators in  
392 arable land? Examining prey choices by molecular gut-content analysis. *Journal of Applied Ecology*,  
393 **48**, 591–599.
- 394 Eitzinger, B., Micic, A., Körner, M., Traugott, M. & Scheu, S. (2013) Unveiling soil food web links: New  
395 PCR assays for detection of prey DNA in the gut of soil arthropod predators. *Soil Biology and*  
396 *Biochemistry*, **57**, 943–945.
- 397 Eitzinger, B., Unger, E.M., Traugott, M. & Scheu, S. (2014) Effects of prey quality and predator body size  
398 on prey DNA detection success in a centipede predator. *Molecular Ecology*, **23**, 3767–3776.
- 399 Englund, G., Öhlund, G., Hein, C. L., & Diehl, S. (2011) Temperature dependence of the functional  
400 response. *Ecology Letters*, **14**, 914–921.
- 401 Finke, D.L. & Denno, R.F. (2002) Intraguild Predation Diminished in Complex-Structured Vegetation:  
402 Implications for Prey Suppression. *Ecology*, **83**, 643–652.
- 403 Fischer, M., Bossdorf, O., Gockel, S., Hänsel, F., Hemp, A., Hessenmöller, D., *et al.* (2010) Implementing  
404 large-scale and long-term functional biodiversity research: The Biodiversity Exploratories. *Basic and*  
405 *Applied Ecology*, **11**, 473–485.
- 406 Folmer, O., Black, M., Hoeh, W., Lutz, R. & Vrijenhoek, R. (1994) DNA primers for amplification of  
407 mitochondrial cytochrome c oxidase subunit I from diverse metazoan invertebrates. *Molecular*  
408 *marine biology and biotechnology*, **3**, 294–9.
- 409 Gowing, G. & Recher, H.F. (1984) Length- weight relationships for invertebrates from forests in south-  
410 eastern New South Wales. *Australian Journal of Ecology*, **9**, 5–8.



- 411 Günther, B., Rall, B. C., Ferlian, O., Scheu, S., & Eitzinger, B. (2014) Variations in prey consumption of  
412 centipede predators in forest soils as indicated by molecular gut content analysis. *Oikos*, **123**, 1192–  
413 1198.
- 414 Halaj, J. & Wise, D.H. (2002) Impact of a detrital subsidy on trophic cascades in a terrestrial grazing food  
415 web. *Ecology*, **83**, 3141–3151.
- 416 Hansen, P. J., Koefoed, P., & Winding, B. (1997) Zooplankton grazing and growth: scaling within the 2-  
417 2,000-micrometer body size range. *Limnology and Oceanography*, **42**, 687–704.
- 418 Hauzy, C., Tully, T., Spataro, T., Paul, G., & Arditi, R. (2010) Spatial heterogeneity and functional response:  
419 An experiment in microcosms with varying obstacle densities. *Oecologia*, **163**, 625–636.
- 420 Heethoff, M., Koerner, L., Norton, R. A., & Rasputnig, G. (2011) Tasty but Protected-First Evidence of  
421 Chemical Defense in Oribatid Mites. *Journal of Chemical Ecology*, **37**, 1037–1043.
- 422 Hesterberg, T., Moore, D.S., Monaghan, S., Clipson, A. & Epstein, R. (2003) *Bootstrap methods and*  
423 *permutation tests. Introduction to the Practice of Statistics*, 5th edn (eds D.S. Moore & G.P.  
424 McCabe), pp. 18/4–18/74. WH Freeman Company, New York.
- 425 Hohberg, K. & Traunspurger, W. (2005) Predator–prey interaction in soil food web: functional response,  
426 size-dependent foraging efficiency, and the influence of soil texture. *Biology and Fertility of Soils*  
427 **41**, 419–427.
- 428 Holling, C. (1959) Some characteristics of simple types of predation and parasitism. *Canadian Entomologist*.  
429 **91**, 385–398.
- 430 Janssen, A., Sabelis, M. W., Magalhães, S., Montserrat, M., & van der Hammen, T. (2007) Habitat structure  
431 affects intraguild predation. *Ecology*, **88**, 2713–9.
- 432 Juen, A. & Traugott, M. (2005). Detecting predation and scavenging by DNA gut-content analysis: a case  
433 study using a soil insect predator-prey system. *Oecologia*, **142**, 344–352.
- 434 Kalinkat, G., Rall, B.C., Vucic-Pestic, O. & Brose, U. (2011) The allometry of prey preferences. *PloS one*, **6**,  
435 e25937.
- 436 Kalinkat, G., Brose, U. & Rall, B.C. (2013a) Habitat structure alters top-down control in litter communities.  
437 *Oecologia*, **172**, 877–887
- 438 Kalinkat, G., Schneider, F.D., Digel, C., Guill, C., Rall, B.C. & Brose, U. (2013b) Body masses, functional  
439 responses and predator-prey stability. *Ecology Letters*, **16**, 1126–34.
- 440 Kalinkat, G., & Rall, B. C. (2015) Effects of Climate Change on the Interactions Between Insect Pests and  
441 Their Natural Enemies. In *Climate Change and Insect Pests. CABI Climate change series (eds C.*  
442 *Björkman and P. Niemelä)* (pp. 74–91).
- 443 Kempson, D., Lloyd, M. & Ghelardi, R. (1963) A new extractor for woodland litter. *Pedobiologia*, **3**, 1-21.
- 444 Klarner, B., Ehnes, R. B., Erdmann, G., Eitzinger, B., Pollierer, M. M., Maraun, M., & Scheu, S. (2014)  
445 Trophic shift of soil animal species with forest type as indicated by stable isotope analysis. *Oikos*,  
446 **123**, 1173–1181.
- 447 Latzel, R. (1880) Die Myriapoden der österreichisch-ungarischen Monarchie. 1.Bd.: Die Chilopoden.  
448 Holder, Wien, 228 pp.

- 449 Lewis, J.G.E. (1981) *The Biology of Centipedes*. Cambridge University Press
- 450 Marcussen, B.M., Axelsen, J.A. & Toft, S. (1999). The value of two Collembola species as food for a  
451 linyphiid spider. *Entomol. Exp. Appl.*, **92**, 29–36.
- 452 Mercer, R.D., Gabriel, A.G.A., Barendse, J., Marshall, D.J. & Chown, S.L. (2001) Invertebrate body sizes  
453 from Marion Island. *Antarctic Science*, **13**, 135–143.
- 454 Messier, F. (1994) Ungulate population models with predation: a case study with the North American moose.  
455 *Ecology*, **75**, 478–488.
- 456 Murdoch, W.W. & Oaten, A. (1975) Predation and population stability. *Advances in Ecological Research*, **9**,  
457 1–131.
- 458 Oelbermann, K. & Scheu, S. (2002) Effects of prey type and mixed diets on survival, growth and  
459 development of a generalist predator, *Pardosa lugubris* (Araneae: Lycosidae). *Basic and Applied*  
460 *Ecology*, **291**, 285–291.
- 461 Oelbermann, K., Langel, R. & Scheu, S. (2008) Utilization of prey from the decomposer system by  
462 generalist predators of grassland. *Oecologia*, **155**, 605–617.
- 463 Pawar, S., Dell, A. I., & Van M. Savage. (2012) Dimensionality of consumer search space drives trophic  
464 interaction strengths. *Nature*, **486**, 485–489.
- 465 Peschel, K., Norton, R., Scheu, S., & Maraun, M. (2006) Do oribatid mites live in enemy-free space?  
466 Evidence from feeding experiments with the predatory mite *Pergamasus septentrionalis*. *Soil Biology*  
467 *and Biochemistry*, **38**, 2985–2989.
- 468 Petchey, O. L., Beckerman, A. P., Riede, J. O. & Warren, P. H. (2008) Size, foraging, and food web  
469 structure. *Proc. Natl. Acad. Sci. U. S. A.* **105**, 4191–6 (2008).
- 470 Peters, K. J., Ophelkeller, K., Bott, N. J., Deagle, B. E., Jarman, S. N., & Goldsworthy, S. D. (2014) Fine-  
471 scale diet of the Australian sea lion (*Neophoca cinerea*) using DNA-based analysis of faeces. *Marine*  
472 *Ecology*, **36**, 347–367.
- 473 Pompanon, F., Deagle, B.E., Symondson, W.O.C., Brown, D.S., Jarman, S.N. & Taberlet, P. (2012) Who is  
474 eating what: diet assessment using next generation sequencing. *Molecular Ecology*, **21**, 1931–1950.
- 475 Poser, T. (1988) Chilopoden als Prädatoren in einem Laubwald. *Pedobiologia*, **31**, 261–281.
- 476 R Development Core Team (2011). *R: A language and environment for statistical computing*. R Foundation  
477 *for Statistical Computing*, Vienna, Austria. <http://www.R-project.org>.
- 478 Rall, B.C., Kalinkat, G., Ott, D., Vucic-Pestic, O. & Brose, U. (2011) Taxonomic versus allometric  
479 constraints on non-linear interaction strengths. *Oikos*, **120**, 483–492.
- 480 Rall, B.C., Brose, U., Hartvig, M., Kalinkat, G., Schwarzmüller, F., Vucic-Pestic, O. & Petchey, O.L. (2012)  
481 Universal temperature and body-mass scaling of feeding rates. *Philosophical transactions of the*  
482 *Royal Society of London. Series B, Biological sciences*, **367**, 2923–34.
- 483 Riede, J. O., Binzer, A., Brose, U., de Castro, F., Curtsdotter, A., Rall, B. C. & Eklöf, A. (2011) Size-based  
484 food web characteristics govern the response to species extinctions, *Basic and Applied Ecology*, **12**,  
485 581–589.
- 486 Sarnelle, O., & Wilson, A. E. (2008) Type III functional response in *Daphnia*. *Ecology*, **89**, 1723–32.

- 487 Schneider, F.D., Scheu, S. & Brose, U. (2012) Body mass constraints on feeding rates determine the  
488 consequences of predator loss. *Ecology Letters*, **15**, 436–443.
- 489 Traugott, M., Kamenova, S., Ruess, L., Seeber, J. & Plantegenest, M. (2013) Empirically Characterising  
490 Trophic Networks: What Emerging DNA- Based Methods, Stable Isotope and Fatty Acid Analyses  
491 Can Offer. *Advances in Ecological Research: Ecological Networks in an Agricultural World*, 1st ed,  
492 pp. 177–224. Elsevier Ltd.
- 493 Vucic-Pestic, O., Rall, B.C., Kalinkat, G. & Brose, U. (2010) Allometric functional response model: body  
494 masses constrain interaction strengths. *Journal of Animal Ecology*, **79**, 249–256.
- 495 Wallinger, C., Staudacher, K., Schallhart, N., Mitterutzner, E., Steiner, E. M., Juen, A., & Traugott, M.  
496 (2014) How generalist herbivores exploit belowground plant diversity in temperate grasslands.  
497 *Molecular Ecology*, **23**, 3826–3837.
- 498 Wirta, H.K., Vesterinen, E.J., Hambäck, P. a., Weingartner, E., Rasmussen, C., Reneerkens, J., Schmidt,  
499 N.M., Gilg, O. & Roslin, T. (2015) Exposing the structure of an Arctic food web. *Ecology and  
500 Evolution*, **5**, 3842–3856.
- 501 Woodward, G. & Hildrew, A.G. (2002) Body-size determinants of niche overlap and intraguild predation  
502 within a complex food web. *Journal of Animal Ecology*, **71**, 1063–1074.

503 **Legends to figures**

504

505 **Fig 1.** Prey detection rates of lithobiid (**A**; n= 532) and geophilomorph centipedes (**C**; n=65) sampled in  
506 autumn 2009 and spring 2010. Specimens tested positive for Collembola prey (**B**; n=141) further were tested  
507 for Collembola prey species. Error bars indicated 95% confidence intervals and letters denote significant  
508 differences in DNA detection rates at  $P < 0.05$ .

509

510 **Fig 2.** Body-size-dependent probability of positive prey-DNA detection of eight taxa in lithobiid centipedes  
511 (n= 532) sampled in autumn 2009 and spring 2010. Rugs on top and bottom of each diagram display single  
512 data points with values 1 or 0.

513

514 **Fig 3.** Body-size-dependent proportion of eight prey taxa in the diet of centipede predators as based on the  
515 functional response model using abundance and body-size data of invertebrates sampled in autumn 2009 and  
516 spring 2010. Upper and lower limit indicate highest and lowest diet proportion in the four forest sites.

517

518 **Fig 4.** Pearson correlation coefficient between the relative proportion of prey in the centipede's diet (as  
519 calculated by functional response models) and the proportion of prey-DNA-positive tested centipede  
520 *Lithobius* sp. (based on molecular gut content data) for each of the eight main prey groups.

521

522

523 **Table 1.** Results of Generalized linear model (GLM) on the effect of predator body mass, square of predator  
524 body mass, prey identity and the two-way interactions on the detection of prey DNA in *Lithobius* predators.  
525 Significant effects are highlighted in bold. Df: degrees of freedom

| Variable                                                         | Df | Deviance | Resid. Df | Resid. Dev | P(> Chi )        |
|------------------------------------------------------------------|----|----------|-----------|------------|------------------|
| NULL                                                             |    |          | 4247      | 2270.2     |                  |
| Log <sub>10</sub> predator body mass                             | 1  | 5.38     | 4246      | 2264.8     | <b>0.0204</b>    |
| Prey identity                                                    | 7  | 386.35   | 4239      | 1878.5     | <b>&lt;0.001</b> |
| Prey identity× Log <sub>10</sub> predator body mass <sup>2</sup> | 8  | 19.05    | 4231      | 1859.5     | <b>0.0146</b>    |



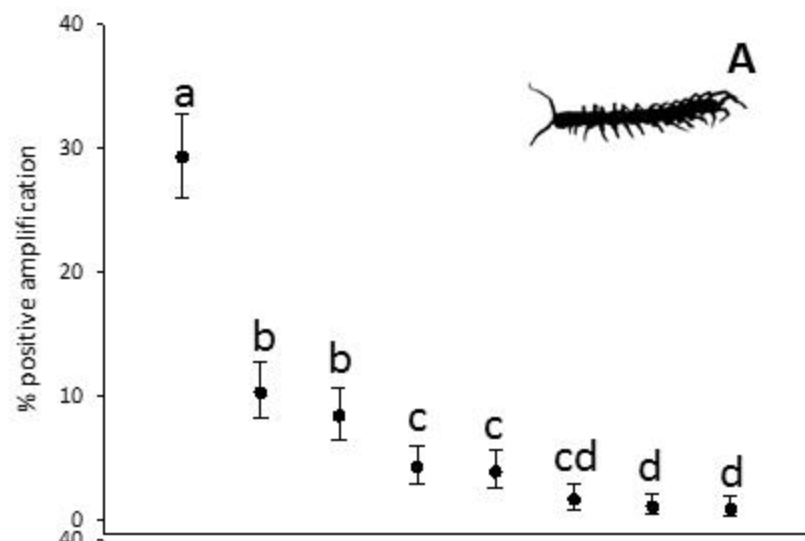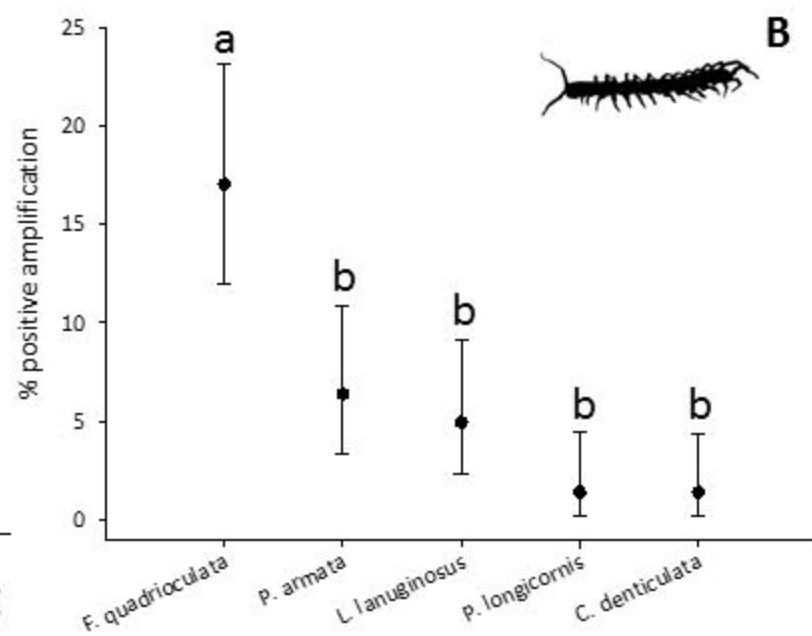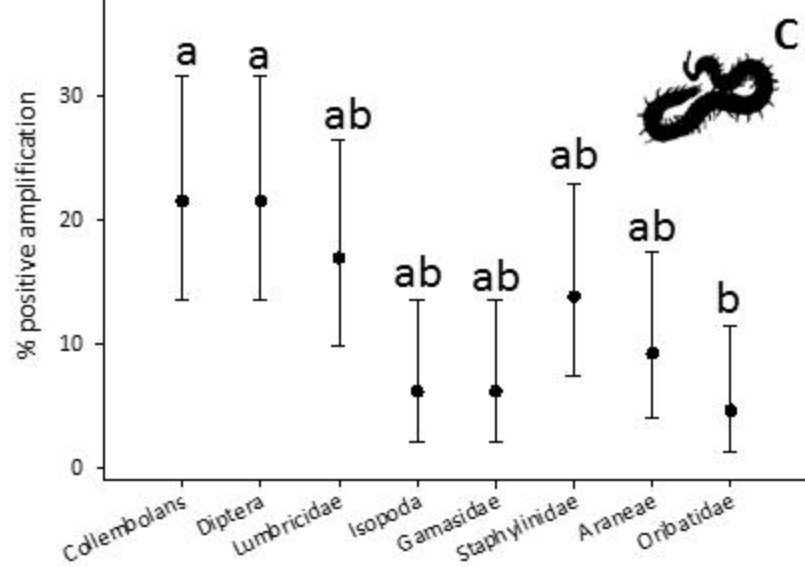

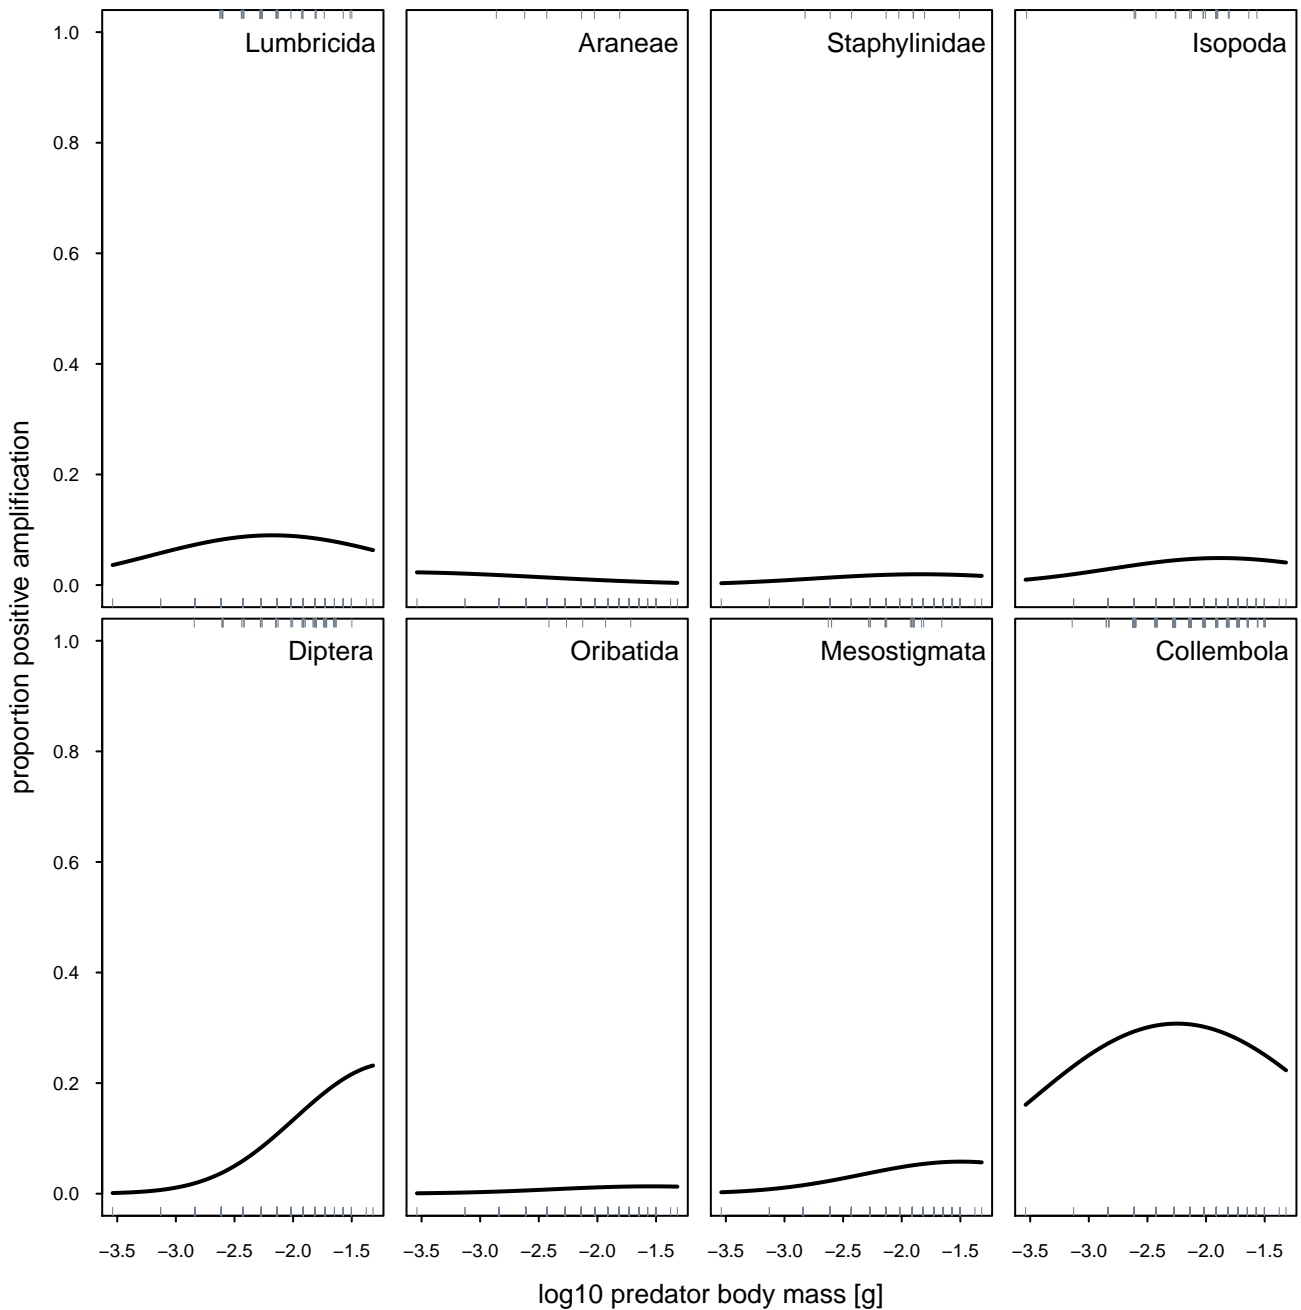



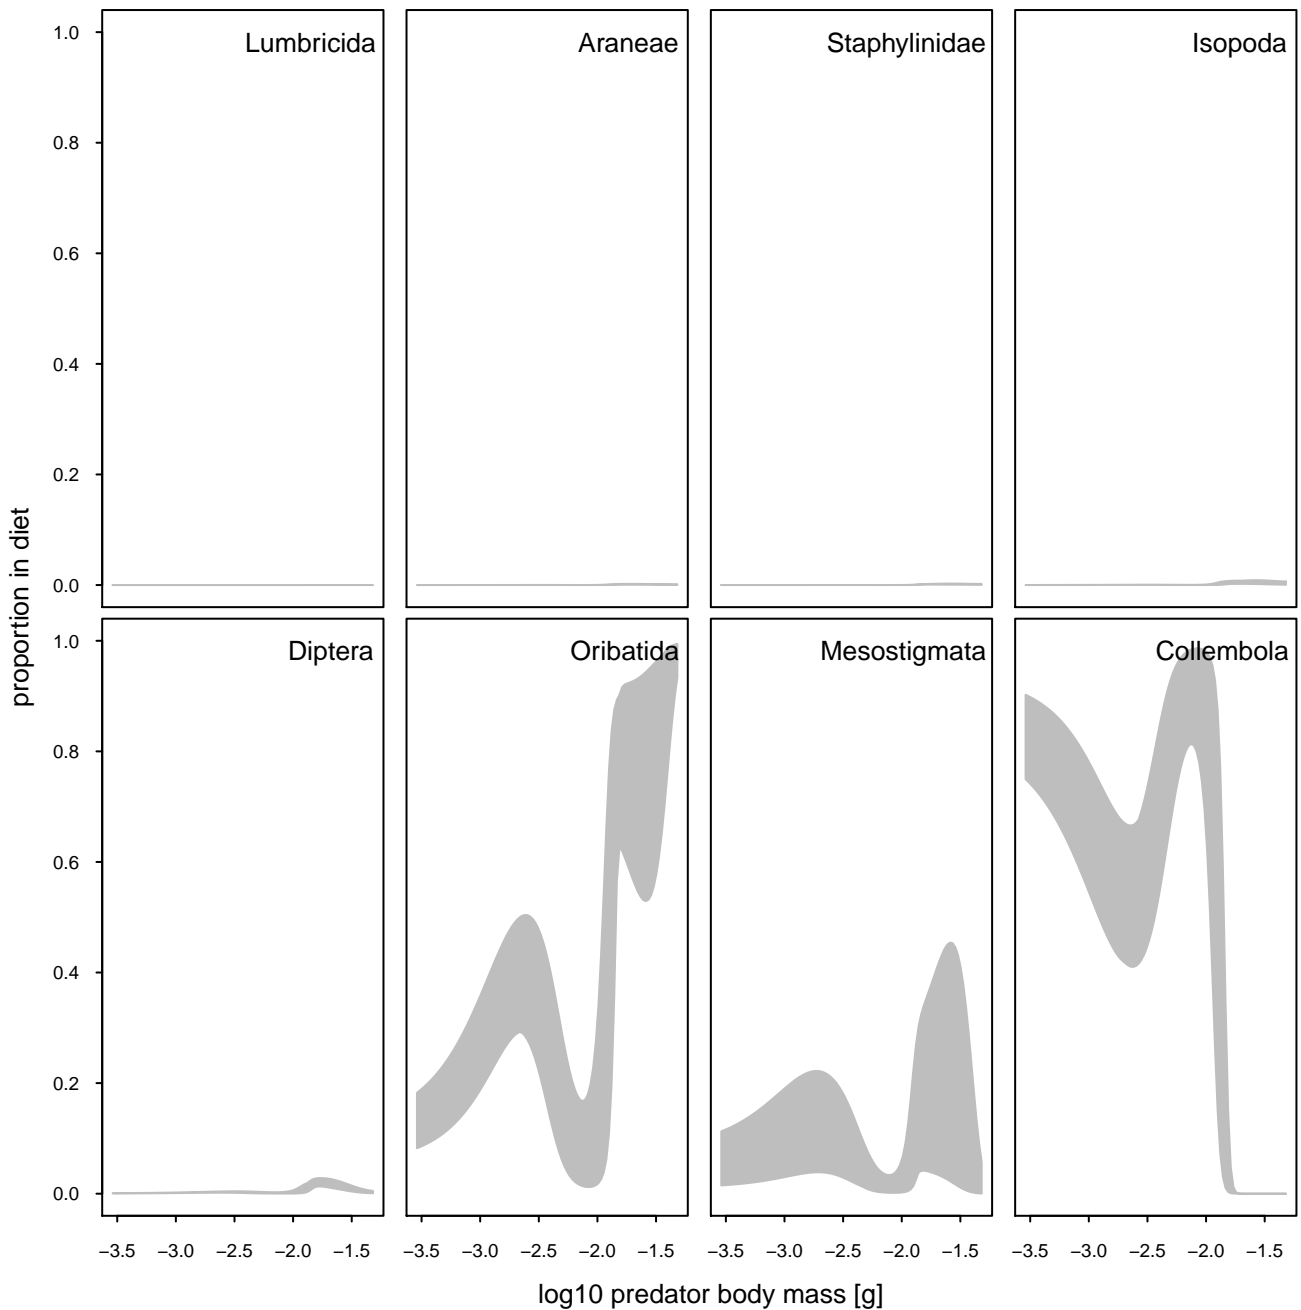

logit ratio prey positive predators

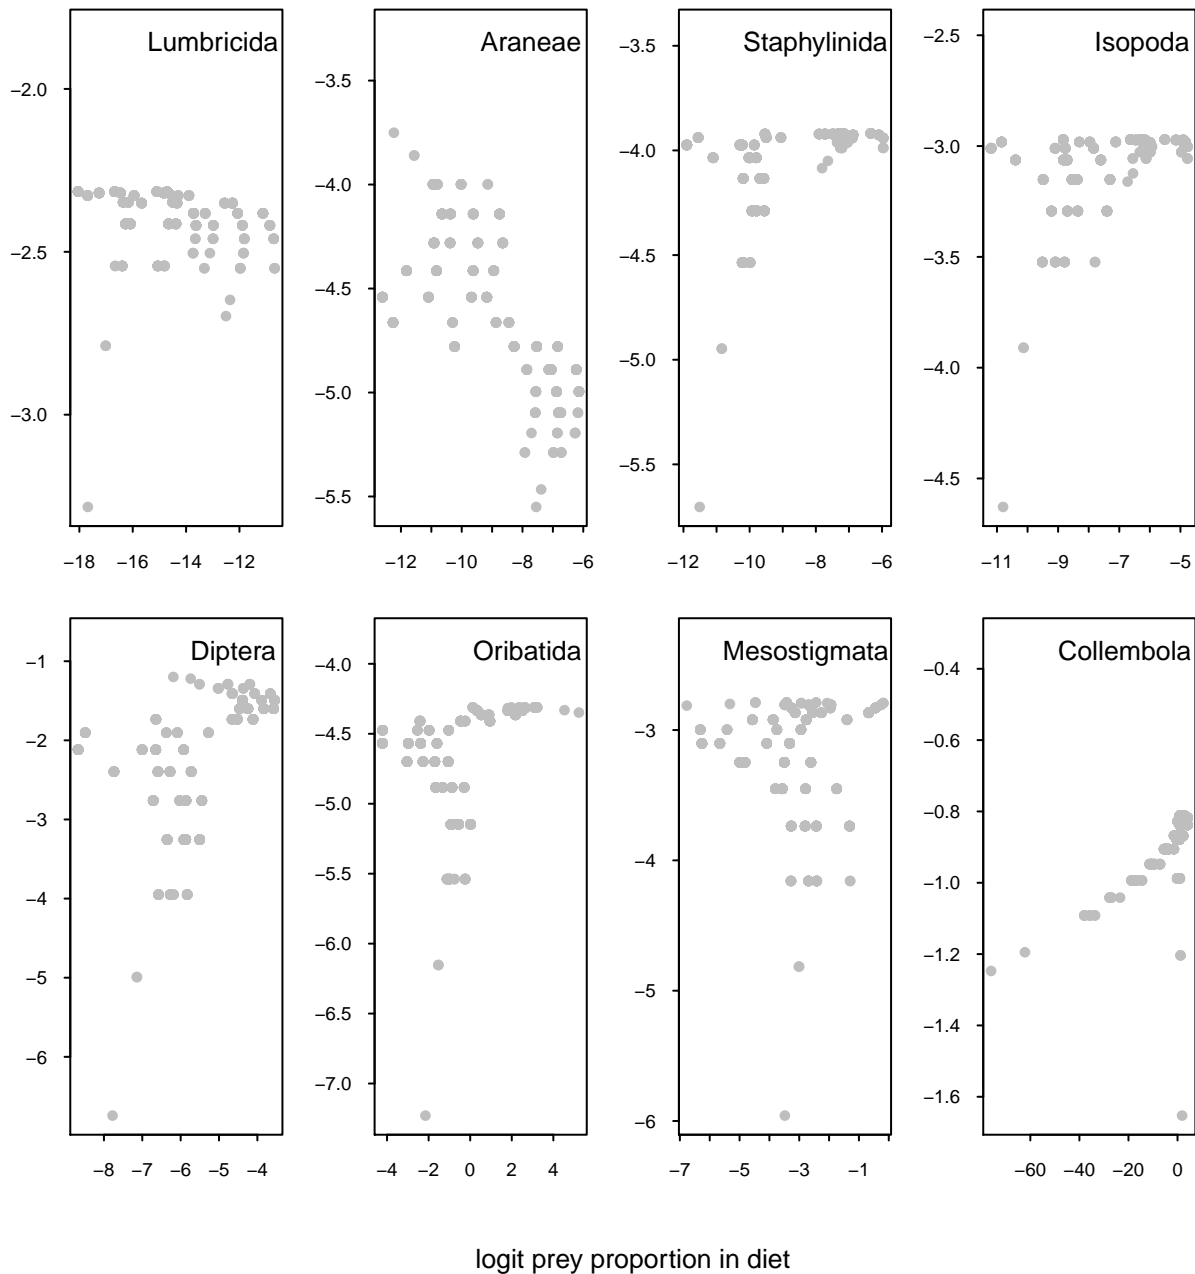

logit prey proportion in diet

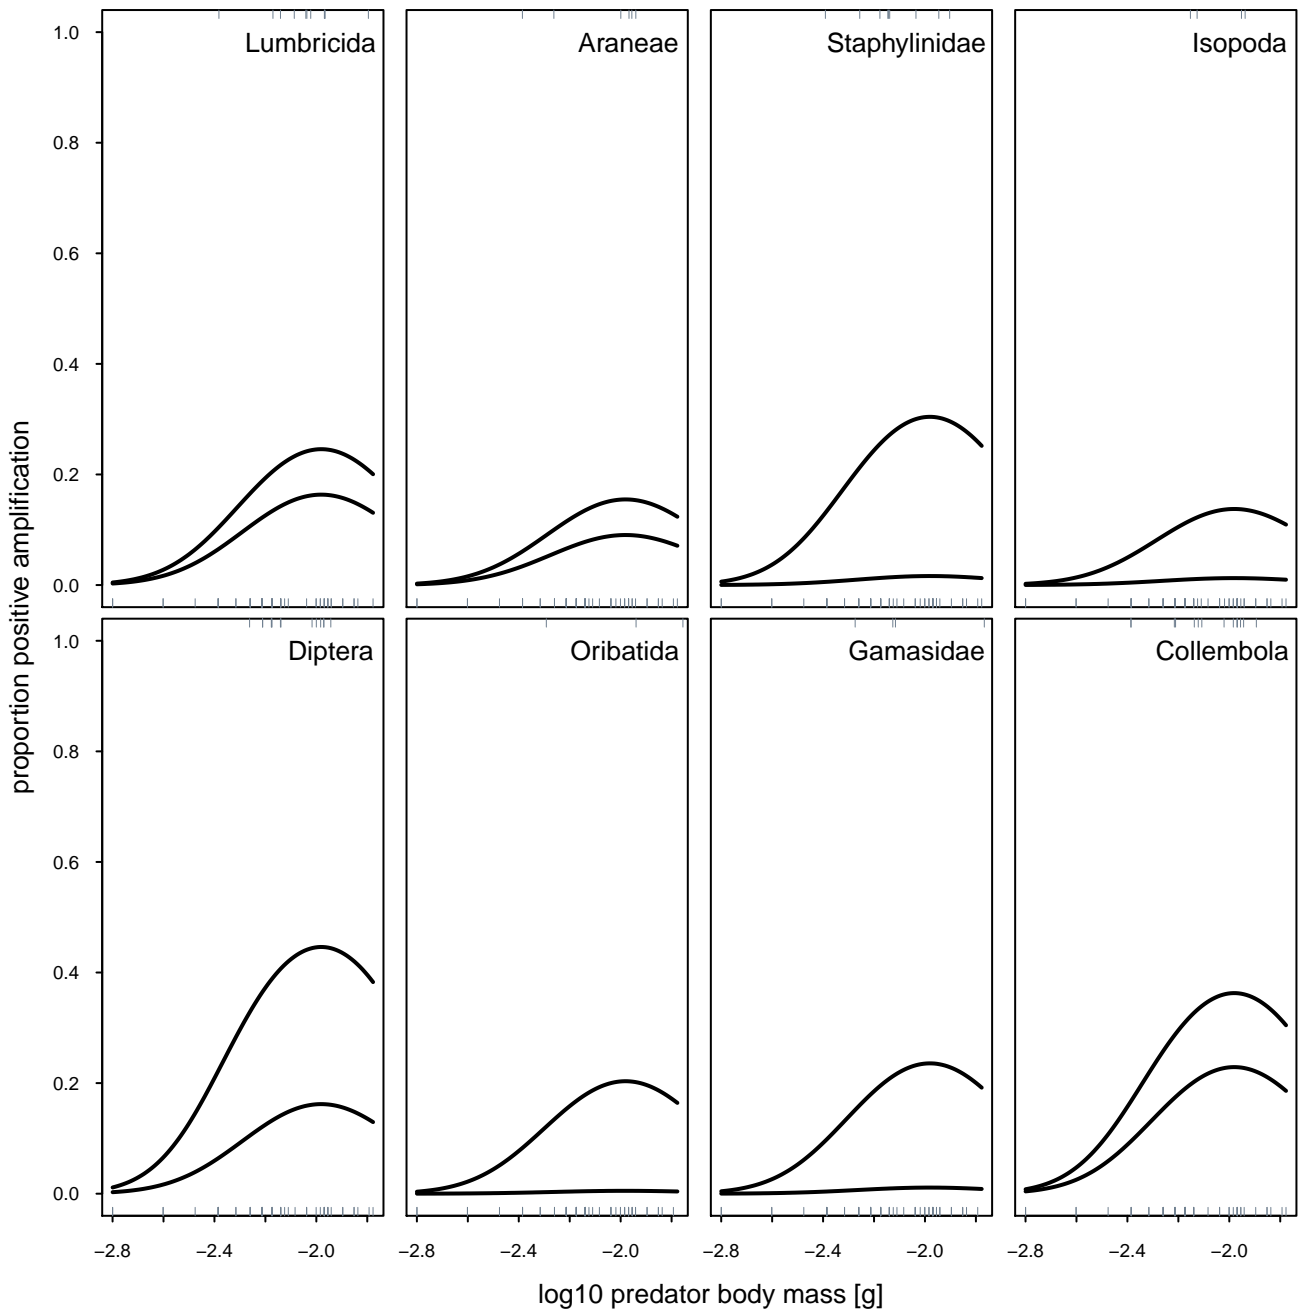

Source: http://www.biorxiv.org/content/10.1101/113944v1.full.pdf
